# Supplementary material for: Boosting the Humidity Performances of Na0.5BixTiO3 by Tuning Bi Content
Source: MDPI journal article supplement (doi:10.3390/nano12142498), 2022-07-21
Supplement: s1 [file s1]

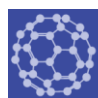

## Supplementary Materials

# Boosting the Humidity Performances of $\text{Na}_{0.5}\text{Bi}_x\text{TiO}_3$ by Tuning Bi Content

Xiaoqi Xuan, Li Li, Tiantian Li, Jinsong Wang, Yi Yu \* and Chunchang Wang \*

Laboratory of Dielectric Functional Materials, School of Materials Science & Engineering, Anhui University, Hefei 230601, China; b20201065@stu.ahu.edu.cn (X.X.); b20101003@stu.ahu.edu.cn (L.L.); b51914048@stu.ahu.edu.cn (T.L.); b20301123@stu.ahu.edu.cn (J.W.)

\* Correspondence: 13070@ahu.edu.cn (Y.Y.); ccwang@ahu.edu.cn (C.W.)

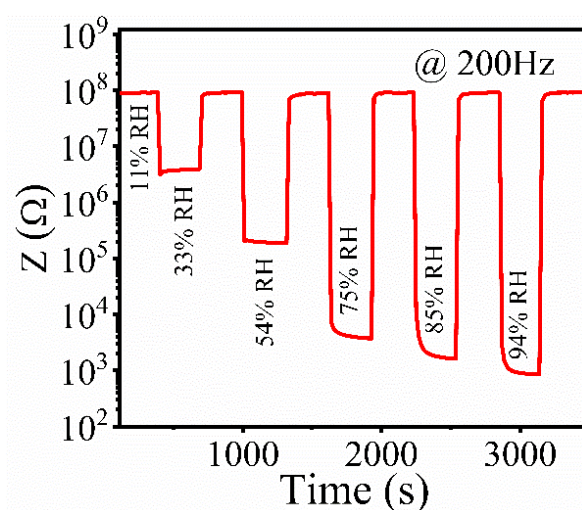

**Figure S1.** Dynamic response–recovery curve of the  $\text{Na}_{0.5}\text{Bi}_{0.35}\text{TiO}_3$ -based sensor between 11 % RH and other RHs.

**Table S1.** Response/recovery time of the  $\text{Na}_{0.5}\text{Bi}_{0.35}\text{TiO}_3$ -based sensor between 11% and other RH levels.

| RH level variation (% RH) | Response time (s) | RH level variation (% RH) | Recovery time (s) |
|---------------------------|-------------------|---------------------------|-------------------|
| 11→33                     | 17.2              | 33→11                     | 22.4              |
| 11→54                     | 10.2              | 54→11                     | 51                |
| 11→75                     | 6.8               | 75→11                     | 10.6              |
| 11→85                     | 3.8               | 85→11                     | 45.9              |
| 11→95                     | 4.5               | 95→11                     | 56.9              |

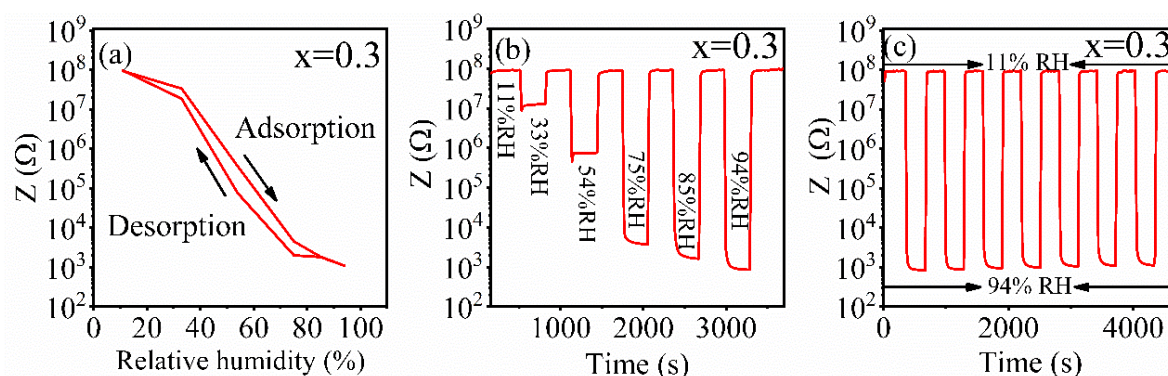

**Figure S2.** The humidity properties of  $\text{Na}_{0.5}\text{Bi}_{0.3}\text{TiO}_3$ -based sensor: (a) Hysteresis behavior, (b) response/recovery curve between 11 % RH and other RHs, and (c) repeatability curve.

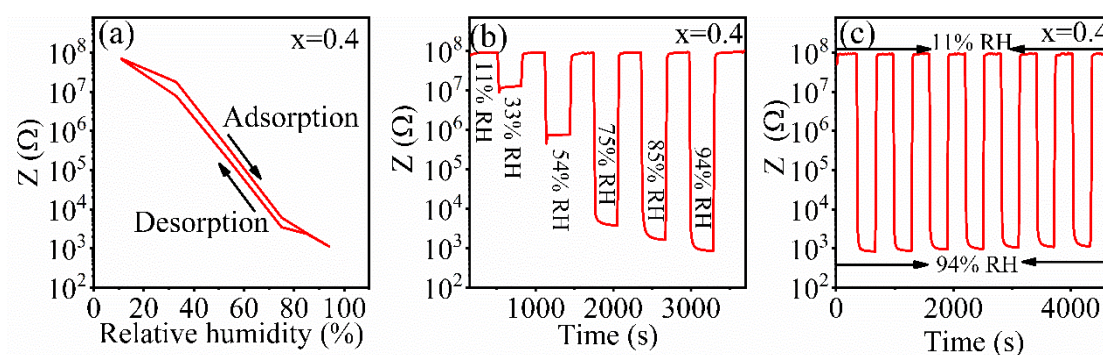

**Figure S3.** The humidity properties of  $\text{Na}_{0.5}\text{Bi}_{0.4}\text{TiO}_3$ -based sensor: (a) Hysteresis behavior, (b) response/recovery curve between 11 % RH and other RHs, and (c) repeatability curve.

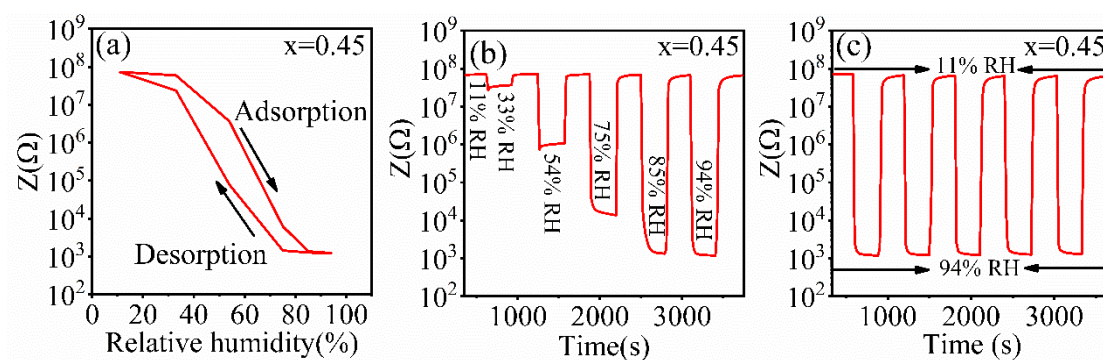

**Figure S4.** The humidity properties of  $\text{Na}_{0.5}\text{Bi}_{0.45}\text{TiO}_3$ -based sensor: (a) Hysteresis behavior, (b) response/recovery curve between 11 % RH and other RHs, and (c) repeatability curve.

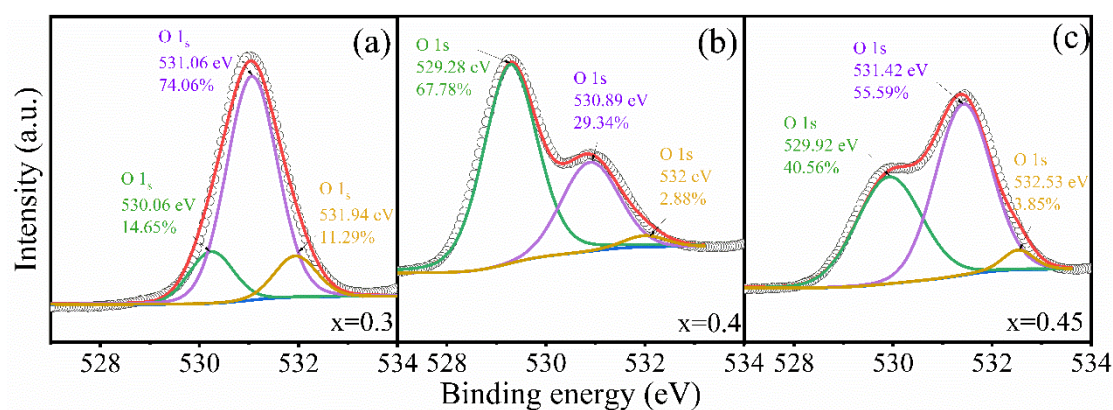

**Figure S5.** High-resolution XPS spectra of the O 1s (a–c) for the  $\text{Na}_{0.5}\text{Bi}_x\text{TiO}_3$  ( $x = 0.3, 0.4$ , and  $0.45$ ).
